# Supplementary material for: Convergence of biological nitration and nitrosation via symmetrical nitrous anhydride
Source: Springer Nature journal article supplement (doi:10.1038/nchembio.1814), 2015-05-25
Supplement: 41589_2015_BFnchembio1814_MOESM285_ESM.pdf [file 41589_2015_BFnchembio1814_MOESM285_ESM.pdf]

## SUPPLEMENTARY INFORMATION

### Convergence of Biological Nitration and Nitrosation via Symmetrical Nitrous Anhydride

Dario A. Vitturi<sup>1</sup>, Lucia Minarrieta<sup>2</sup>, Sonia R. Salvatore<sup>1</sup>, Edward M. Postlethwait<sup>3</sup>, Marco Fazzari<sup>1,4</sup>, Gerardo Ferrer-Sueta<sup>5,6</sup>, Jack R. Lancaster Jr.<sup>1,7,8</sup>, Bruce A. Freeman<sup>1,#</sup> and Francisco J. Schopfer<sup>1,#</sup>.

Departments of <sup>1</sup>Pharmacology and Chemical Biology, <sup>7</sup>Medicine and <sup>8</sup>Surgery. University of Pittsburgh. Pittsburgh, PA, USA. <sup>2</sup>Cátedra de Inmunología, <sup>5</sup>Laboratorio de Físicoquímica Biológica, and <sup>6</sup>Center for Free Radical and Biomedical Research. Universidad de la República, Montevideo, Uruguay. <sup>3</sup>Department of Environmental Health Sciences, University of Alabama at Birmingham, Birmingham, AL, USA. <sup>4</sup>Fondazione Ri.MED, Palermo, Italy.

<sup>#</sup>To whom correspondence may be addressed: Bruce A. Freeman, Ph.D. or Francisco J. Schopfer, Ph.D., Department of Pharmacology & Chemical Biology, Thomas E. Starzl Biomedical Science Tower E1340, 200 Lothrop St, University of Pittsburgh, Pittsburgh, PA 15213, USA; Tel: 648-9319; Fax: (412) 648-2229; Email: [freerad@pitt.edu](mailto:freerad@pitt.edu) or [fjs2@pitt.edu](mailto:fjs2@pitt.edu).

## SUPPLEMENTARY RESULTS

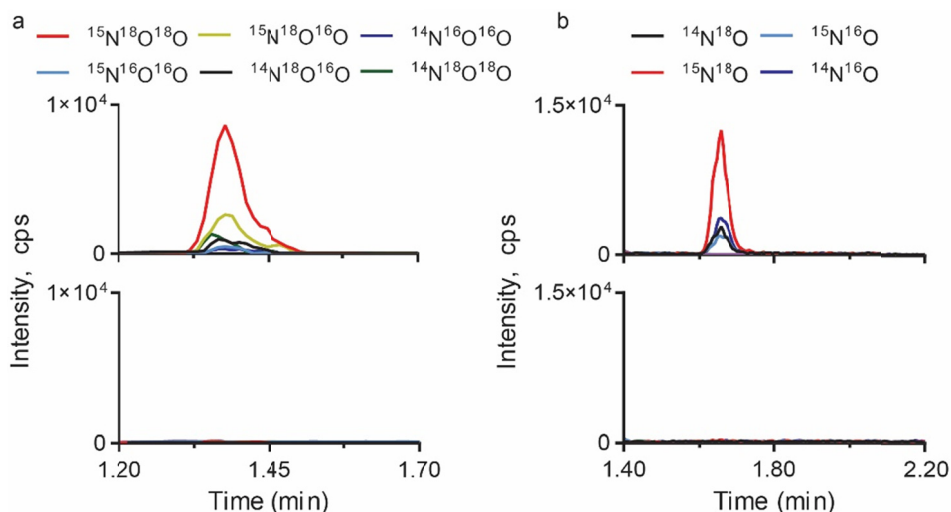

**Supplementary Figure 1.  $\text{NO}_2^-$  does not mediate CLA nitration and GSH nitrosation in the absence of  $\bullet\text{NO}$ .** **a**, CLA (20  $\mu\text{M}$ ) and  $^{15}\text{N}^{18}\text{O}_2^-$  (2 mM) were incubated for 100 min in 20 mM BisTris + 100  $\mu\text{M}$  DTPA pH 7.0 and 25  $^\circ\text{C}$  in the presence (top panel) or absence (bottom panel) of 25  $\mu\text{M}$  MNO. Representative LC-MS/MS traces show no formation of  $\text{NO}_2\text{-CLA}$  isotopologues in the absence of  $\bullet\text{NO}$  donor. **b**, GSH (20  $\mu\text{M}$ ) and  $^{15}\text{N}^{18}\text{O}_2^-$  (2 mM) were incubated for 120 min in 20 mM BisTris + 100  $\mu\text{M}$  DTPA pH 7.0 and 25  $^\circ\text{C}$  in the presence (top panel) or absence (bottom panel) of 2.5  $\mu\text{M}$  MNO. Representative traces demonstrate that GSNO formation was not detected in the absence of  $\bullet\text{NO}$  donor.

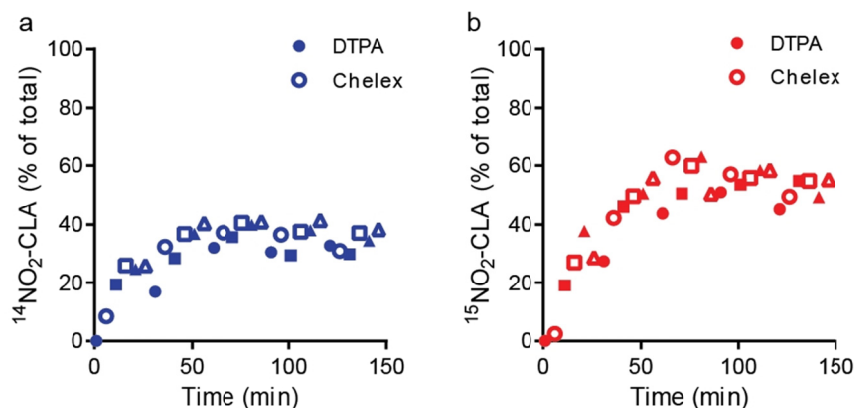

**Supplementary Figure 2.  $\text{NO}_2^-$  dependent CLA nitration is independent of metal catalysis.** Identical yields and distribution of  $^{14}\text{NO}_2\text{-CLA}$  (a) and  $^{15}\text{NO}_2\text{-CLA}$  (b) formation from CLA (20  $\mu\text{M}$ ) nitration in the presence of 200  $\mu\text{M}$   $^{15}\text{NO}_2^-$  using either DTPA (100  $\mu\text{M}$ ) or Chelex treatment to remove adventitious metals from the reaction buffer (20 mM BisTris pH 7.0).

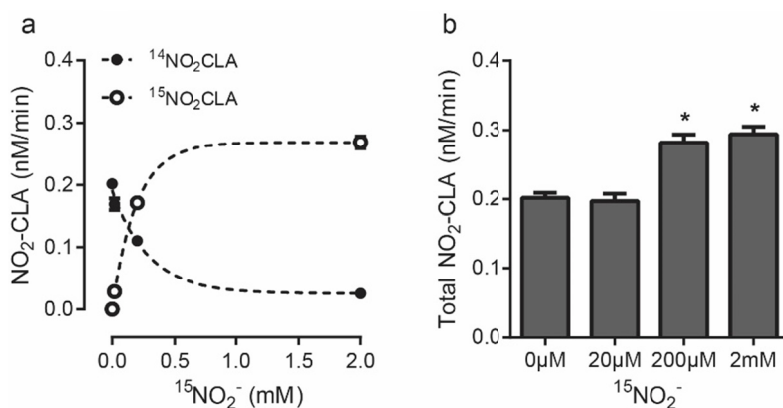

**Supplementary Figure 3.**  $^{15}\text{NO}_2^-$  participates in CLA nitration in the absence of cellular components. **a**, Plot of initial rates of  $\text{NO}_2\text{-CLA}$  formation showing reciprocal modulation of the  $^{14}\text{N}$  and  $^{15}\text{N}$  containing products by  $^{15}\text{NO}_2^-$ . Data are means  $\pm$ SE ( $n=4$ ), with non-linear fits provided for illustrative purposes. **b**, The global initial rate of  $\text{NO}_2\text{-CLA}$  formation ( $^{14}\text{NO}_2\text{-CLA} + ^{15}\text{NO}_2\text{-CLA}$ ) is moderately increased by  $^{15}\text{NO}_2^-$  concentration versus no-nitrite controls as determined by one way ANOVA and Bonferroni's multiple comparison test. Data are means  $\pm$ SD ( $n=4$ ), \*  $p < 0.0001$ .

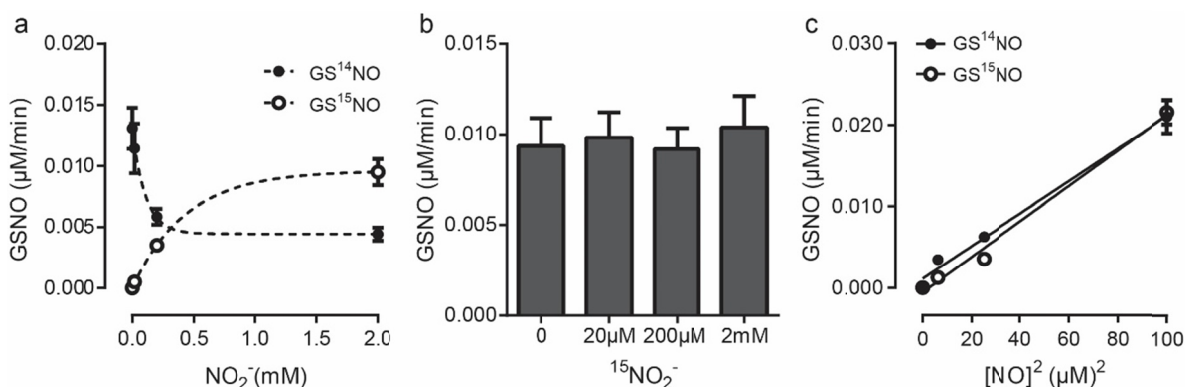

**Supplementary Figure 4.**  $^{15}\text{NO}_2^-$  is incorporated into S-nitrosoglutathione in the presence of  $\bullet\text{NO}$ . **a**, Initial  $\text{GS}^{14}\text{NO}$  and  $\text{GS}^{15}\text{NO}$  formation rates plotted versus  $^{15}\text{NO}_2^-$  concentration illustrating reciprocal modulation of  $^{14}\text{N}$ - and  $^{15}\text{N}$ -containing products. Data are means  $\pm$ SD ( $n=4$ ), fits are provided for illustrative purposes. **b**, No effect of  $^{15}\text{NO}_2^-$  in the global initial rate of GSNO formation as determined by one way ANOVA. Data are means  $\pm$ SD ( $n=4$ ). **c**, Initial rates of  $\text{GS}^{14}\text{NO}$  and  $\text{GS}^{15}\text{NO}$  formation are linearly dependent on  $[\bullet\text{NO}]^2$  ( $R^2 > 0.99$ ), consistent with a process limited by  $\bullet\text{NO}$  autoxidation (20  $\mu\text{M}$  GSH, 200  $\mu\text{M}$   $^{15}\text{NO}_2^-$ ). Data are means  $\pm$ SD ( $n=4$ ).

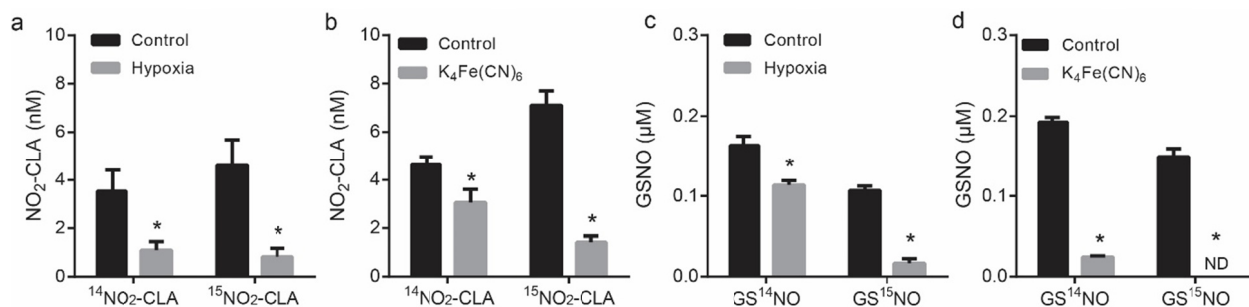

**Supplementary Figure 5.  $\bullet\text{NO}_2$  is required for nitrite-dependent  $^{15}\text{NO}_2\text{-CLA}$  and  $\text{GS}^{15}\text{NO}$  formation.** a-b, Formation of  $^{14}\text{NO}_2\text{-CLA}$  and  $^{15}\text{NO}_2\text{-CLA}$  (25  $\mu\text{M}$  MNO, 200  $\mu\text{M}$   $^{15}\text{NO}_2^-$ , 90 minutes) is inhibited both under hypoxic conditions (a) and by 1mM  $\text{K}_4\text{Fe}(\text{CN})_6$  (b), \*  $p < 0.001$  versus corresponding control. c-d,  $\text{GS}^{14}\text{NO}$  and  $\text{GS}^{15}\text{NO}$  formation (2.5  $\mu\text{M}$  MNO, 200  $\mu\text{M}$   $^{15}\text{NO}_2^-$ , 90 minutes) is inhibited by low oxygen tension (c) and 1mM  $\text{K}_4\text{Fe}(\text{CN})_6$  (d), \*  $p < 0.0001$  versus corresponding control. Data are mean  $\pm$  SD (n=4) of independent experiments. Two-way ANOVA and Bonferroni's multiple comparison were used to test statistical significance.

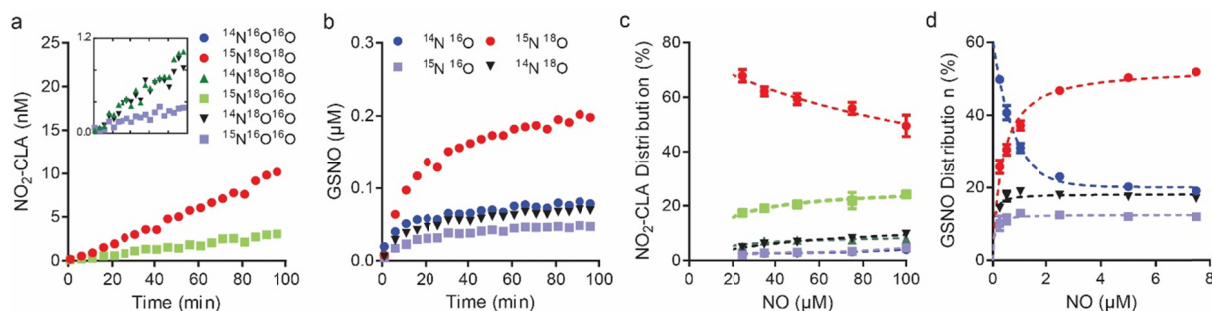

**Supplementary Figure 6.  $\text{NO}_2^-$  incorporation into GSNO and  $\text{NO}_2\text{-CLA}$  is associated with  $\text{symN}_2\text{O}_3$  formation.** a, Time-dependent generation of mixed  $^{14}\text{N}/^{15}\text{N}$  and  $^{18}\text{O}/^{16}\text{O}$   $\text{NO}_2\text{-CLA}$  isotopologues from the reaction of 2 mM  $^{15}\text{N}^{18}\text{O}_2^-$  with of 25  $\mu\text{M}$  MNO. Insert shows additional low-abundance  $\text{NO}_2\text{-CLA}$  isotopologues. Data are representative traces generated by combining time-staggered replicates (n=4). b, Formation of mixed  $^{14}\text{N}/^{15}\text{N}$  and  $^{18}\text{O}/^{16}\text{O}$  GSNO from 2.5  $\mu\text{M}$  MNO and 2 mM  $^{15}\text{N}^{18}\text{O}_2^-$ . Traces represent four time-staggered replicates. c,  $\text{NO}_2\text{-CLA}$  distribution versus  $\bullet\text{NO}$  concentration in the presence of 2 mM  $^{15}\text{N}^{18}\text{O}_2^-$ . Data are mean  $\pm$ SD (n=4), fits are provided for illustrative purposes. d, Percent GSNO distribution in the presence of 2 mM  $^{15}\text{N}^{18}\text{O}_2^-$  nitrite, with increased formation of isotopically-scrambled products at higher  $\bullet\text{NO}$  concentrations. Data are mean  $\pm$ SD (n=4), fits are provided for illustrative purposes.

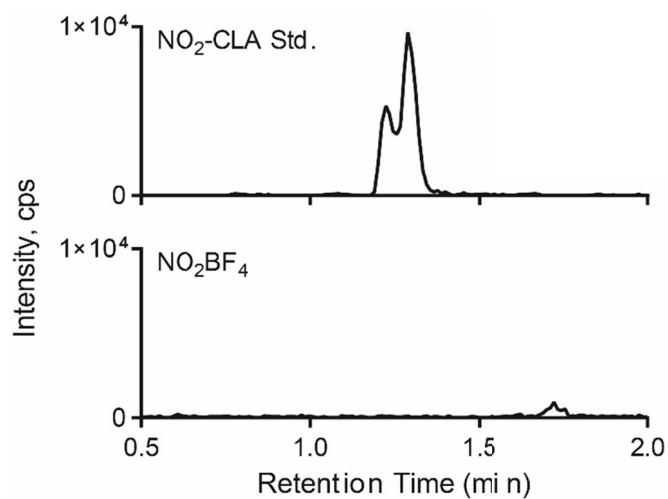

**Supplementary Figure 7. NO<sub>2</sub><sup>+</sup> does not mediate NO<sub>2</sub>-CLA CLA nitration.** Representative LC-MS/MS traces showing no CLA (20 μM) nitration by NO<sub>2</sub>BF<sub>4</sub> (50 μM) following 90 min incubation in 20 mM BisTris + 100 μM DTPA pH 7.0 and 25 °C (bottom panel). A NO<sub>2</sub>-CLA standard is provided in the top panel for reference.

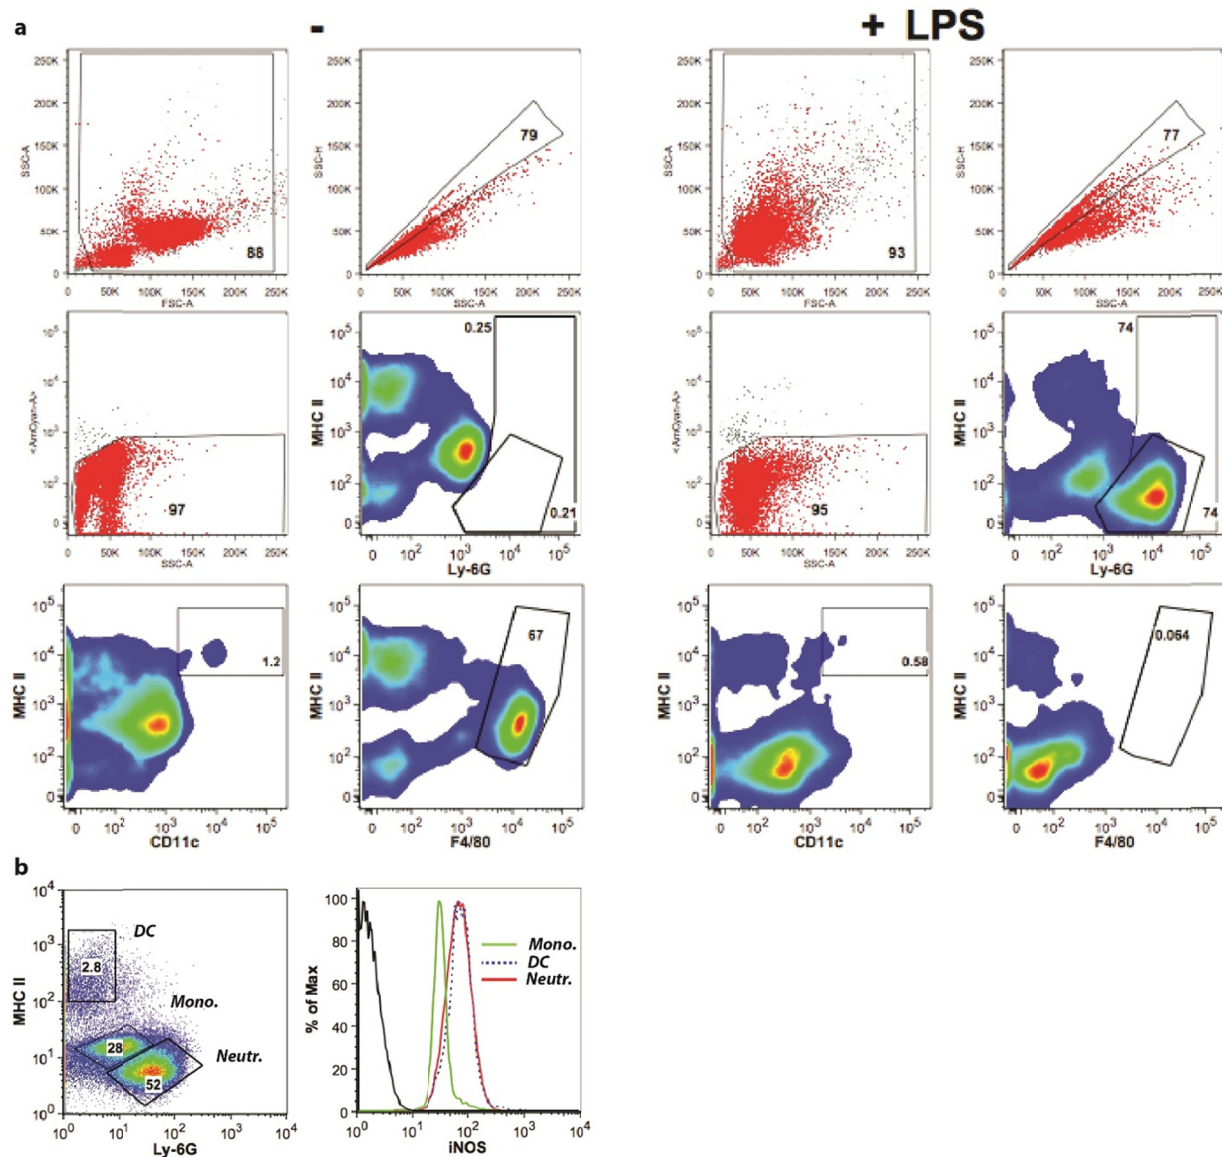

**Supplementary Figure 8. Distribution of peritoneal cell subpopulations during LPS-induced inflammation.** **a**, Intraperitoneal LPS injection in an incomplete Freund adjuvant emulsion leads to resident macrophage depletion (F480<sup>+</sup>, MHCII<sup>INT</sup>) and massive recruitment of neutrophils (Ly6G<sup>HI</sup>, CD11b<sup>+</sup>) and inflammatory monocytes (Ly6G<sup>INT</sup>, CD11b<sup>+</sup>) 18 hours after treatment. Dendritic cells are also present (CD11c<sup>+</sup>, MHCII<sup>HI</sup>) in the peritoneal cavity. **b**, Distribution of iNOS expression among inflammatory cell subpopulations in LPS-treated mice.

a

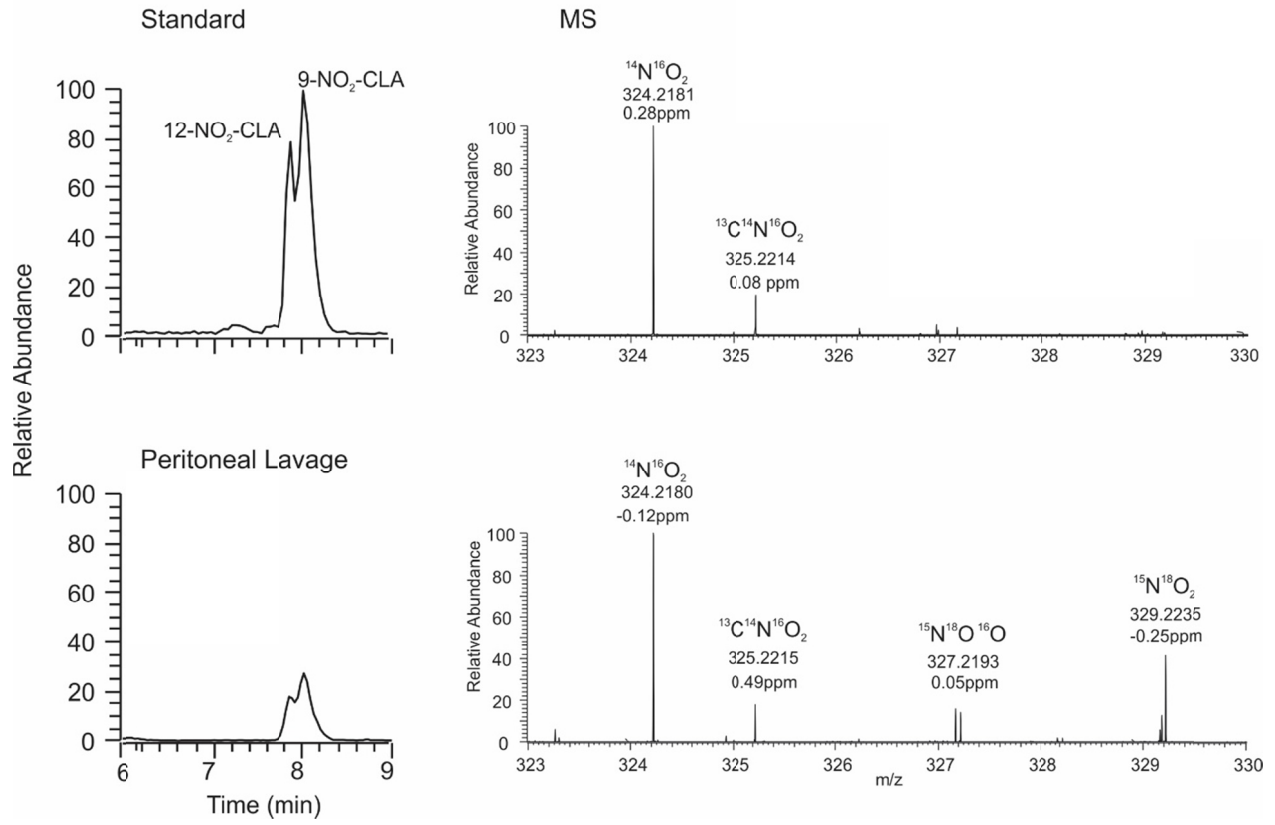

**b**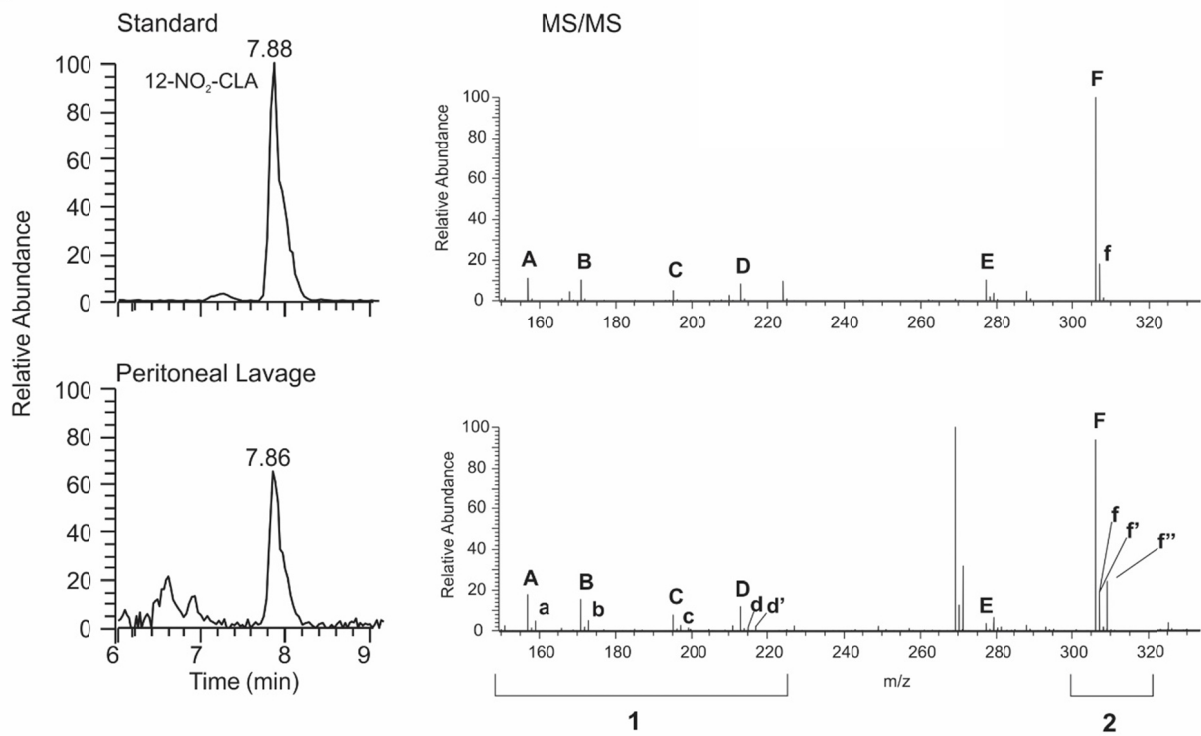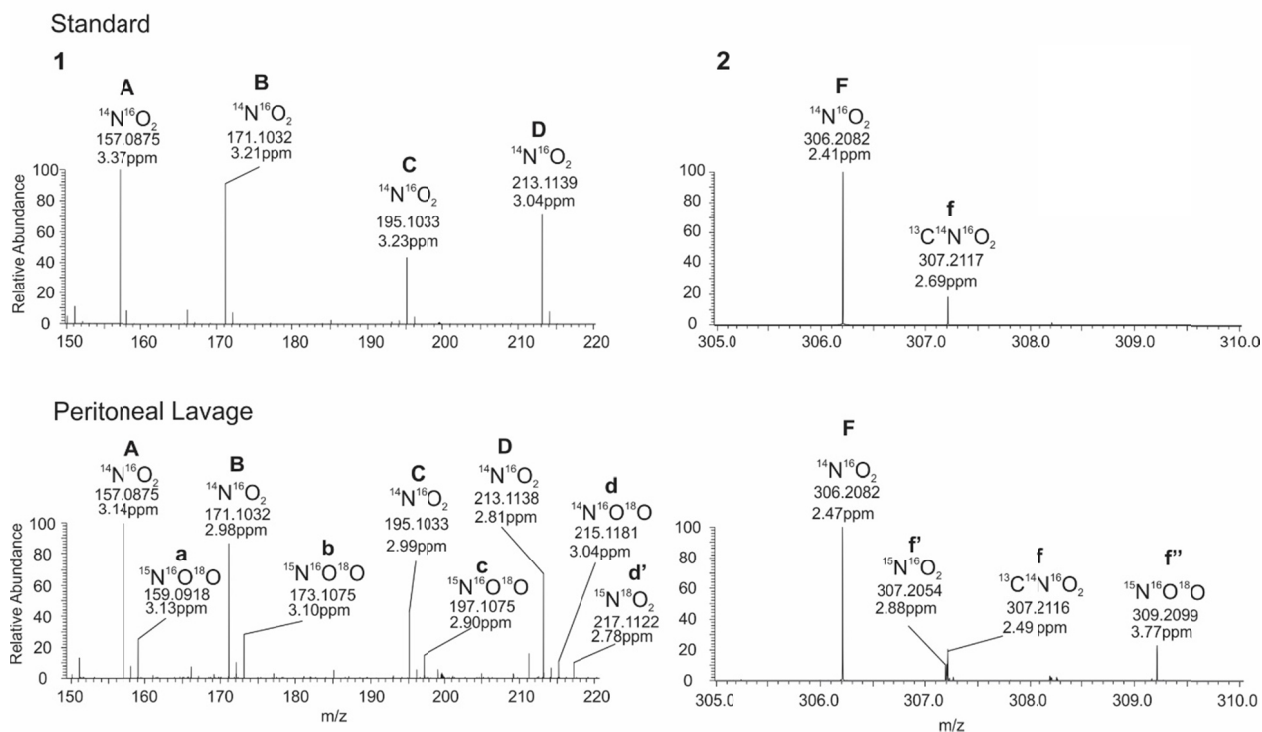



**c**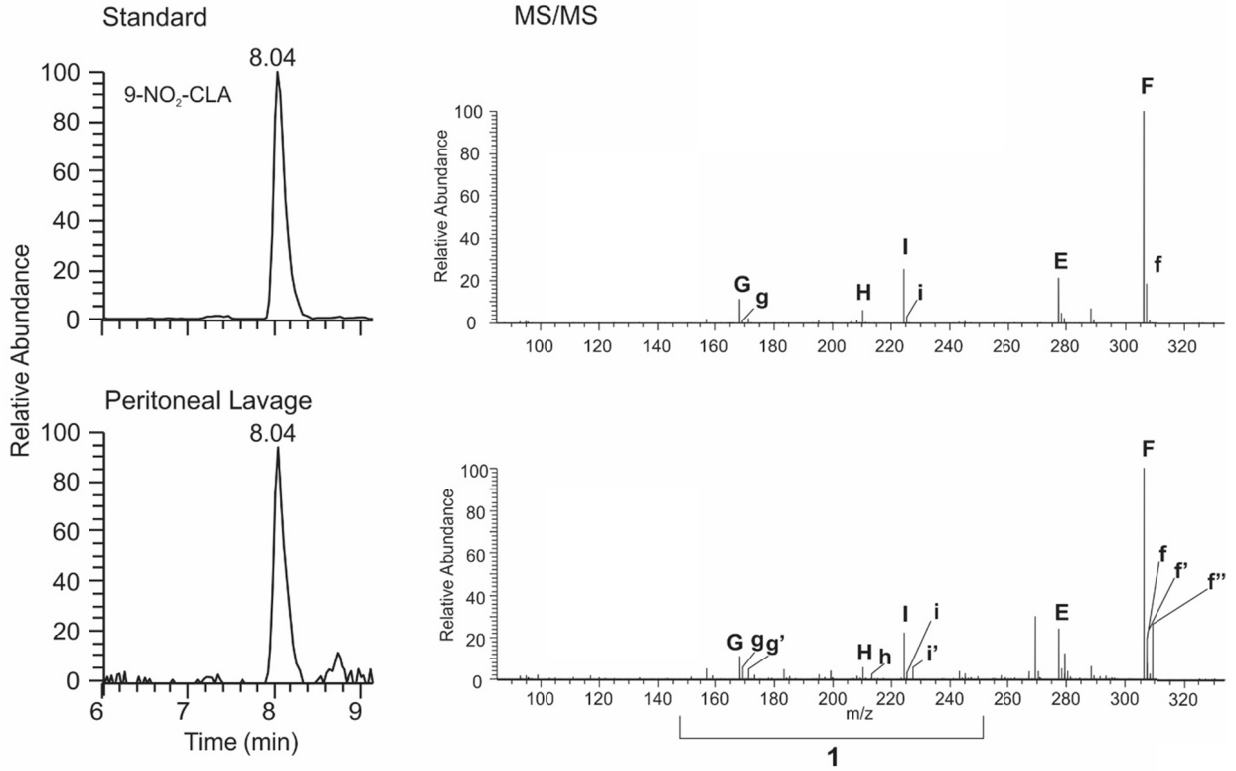**1 Standard**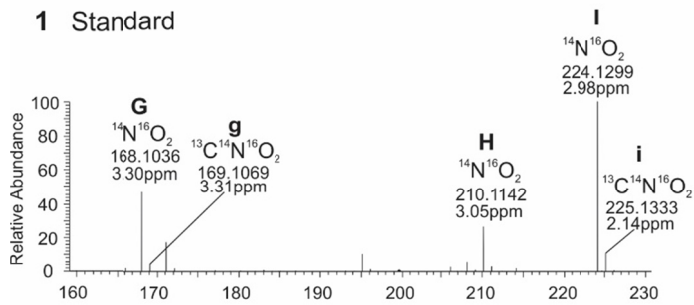**Peritoneal Lavage**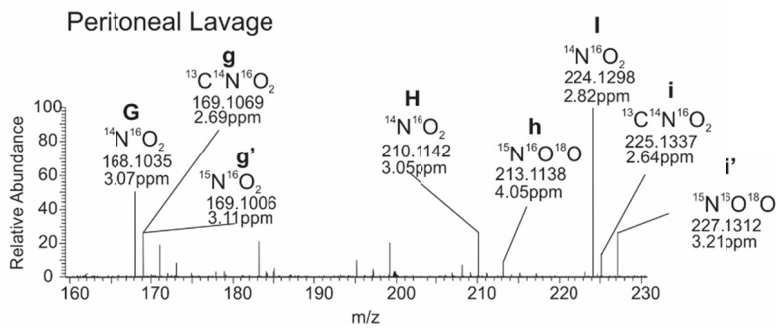

**Supplementary Figure 9. High resolution MS/MS analysis of  $^{15}\text{N}^{18}\text{O}_2^-$ -derived  $\text{NO}_2\text{-CLA}$  isotopologues generated during acute peritoneal inflammation.** **a**, LC-MS/MS analysis revealed two positional isomers for each  $\text{NO}_2\text{-CLA}$  isotopologue, i.e. 9- $\text{NO}_2\text{-CLA}$  and 12- $\text{NO}_2\text{-CLA}$ . An identical chromatographic profile and retention times were observed for both synthetic standards (upper panel) and peritonitis plus  $^{15}\text{N}^{18}\text{O}_2$  supplementation samples (lower panel). **b-c**, Individual high resolution MS/MS analysis of the positional 9- $\text{NO}_2\text{-CLA}$  (**b**) and 12- $\text{NO}_2\text{-CLA}$  (**c**) isomers and their corresponding containing isotopologues showed the expected losses of  $\text{H}_2\text{O}$  ( $\Delta$  mass = 18.0106) and  $\text{H}_2^{18}\text{O}$  ( $\Delta$  mass = 20.0148) from the  $\text{NO}_2$  group to form product ions with  $m/z$  306.2082, 307.2054, and 309.2099 (peaks F, f' and f''). The naturally-occurring  $^{13}\text{C}$  containing product ions were also resolved and were distinct from the  $^{15}\text{N}$  products at a 60000 resolution (Panel b, peak f. Panel c, peaks g-i). Specific product ions derived from carbon chain fragmentation of the isotopologues further confirmed the incorporation of labeled  $\text{NO}_2^-$  and the formation of nitroalkene isomers identical to those observed in chemical reaction systems and *in vitro* cell culture models. In this regard, fragmentation of the isotopologues of 12- $\text{NO}_2\text{-CLA}$  generated the same pattern of product ions as the synthetic standard and as previously reported (References 13 and 14 in the main text). In addition to the  $^{13}\text{C}$  isotopes observed in both the synthetic 12- $\text{NO}_2\text{-CLA}$  and the peritoneal inflammation sample, easily recognizable products ions containing isotopically-labeled O atoms were identified and confirmed at a 3 ppm resolution (Panel b, peaks A-D, a-d and d'). As previously reported, product ions stemming from carbon chain fragmentation of 12- $\text{NO}_2\text{-CLA}$  lose their nitrogen as the result of a cyclization reaction, thus no ions containing  $^{15}\text{N}$  are observed (Figure 5b). The same approach was used to characterize 9- $\text{NO}_2\text{-CLA}$  isomers, where the fragmentation of this isomer is characterized by retaining the N atom. Biologically-generated 9- $\text{NO}_2\text{-CLA}$  shows the same fragmentation pattern as synthetic 9- $\text{NO}_2\text{-CLA}$  with the addition of the labeled  $^{15}\text{N}$  and  $^{18}\text{O}$  atoms confirmed at high resolution at the 3 ppm level (Panel c, peaks G-I, g'-i'). Corresponding structures and measured  $m/z$  for product ions detected in this figure are provided in Supplementary Table 2.

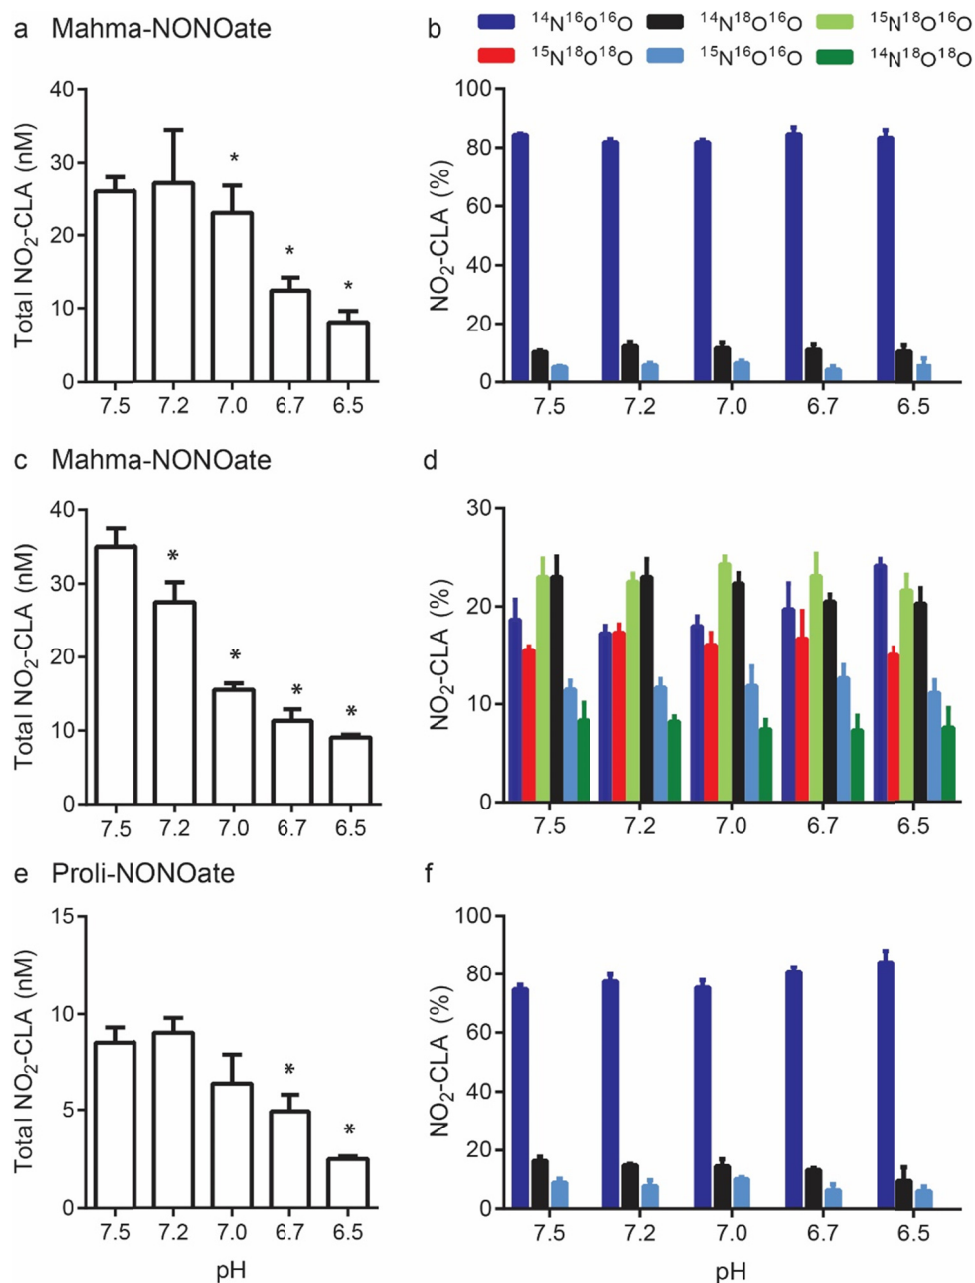

**Supplementary Figure 10. pH dependence of CLA nitration by symN<sub>2</sub>O<sub>3</sub>.** CLA nitration by 20 μM (a-b) and 200 μM (c-d) <sup>15</sup>N<sup>18</sup>O<sub>2</sub><sup>-</sup> was determined after 90 min incubations with 20 mM BisTris +100 μM DTPA and 25 μM mahma-NONOate at the indicated pH values. e-f, CLA nitration in the presence of 20 μM was induced by addition of 25 μM of the fast-releasing NO-donor proli-NONOate (half-life < 2 s) under the same conditions as before. For all panels, data are mean ± SD (n=4). Total CLA nitration was reduced at lower pH values as determined by one-way ANOVA analysis. \* p < 0.05 versus pH = 7.5.

**Supplementary Table 1.** Exogenous and endogenous nitrite levels in peritoneal lavages 1 h post CLA/ $^{15}\text{N}^{18}\text{O}_2^-$  injection.

| Nitrite Injected | Peritoneal Nitrite (nmoles)     |            |                                 |            |       |                     |
|------------------|---------------------------------|------------|---------------------------------|------------|-------|---------------------|
|                  | $[^{14}\text{N}] \text{NO}_2^-$ |            | $[^{15}\text{N}] \text{NO}_2^-$ |            | Total | % $[^{15}\text{N}]$ |
|                  | Mean                            | SD         | Mean                            | SD         |       |                     |
| 20 nmoles        | 3.61                            | $\pm 0.71$ | 0.18                            | $\pm 0.15$ | 3.78  | 4.7 %               |
| 200 nmoles       | 3.27                            | $\pm 1.97$ | 0.30                            | $\pm 0.14$ | 3.57  | 8.4 %               |

**Supplementary Table 2.** Structures, measured m/z, atomic composition and corresponding precursors for product ions generated from 9- and 12-NO<sub>2</sub>-CLA isotopologues isolated from peritoneal lavages.

|    | Fragment Exp | Fragment Theoretical | Fragment Composition                                                                                      | Fragment Structure | NO <sub>2</sub> -FA                                                                                                                                                                                                  |
|----|--------------|----------------------|-----------------------------------------------------------------------------------------------------------|--------------------|----------------------------------------------------------------------------------------------------------------------------------------------------------------------------------------------------------------------|
| A  | 157.0875     | 157.087              | C <sub>8</sub> H <sub>13</sub> O <sub>3</sub> <sup>-</sup>                                                |                    | <b>12-NO<sub>2</sub>-CLA</b><br>Exp Mass: 324.2180<br>Exact Mass: 324.2180<br>or<br><b>12-<sup>15</sup>N<sup>18</sup>O<sup>16</sup>O-CLA</b><br>Exp Mass: 327.2193<br>Exact Mass: 327.2193                           |
| B  | 171.1032     | 171.1027             | C <sub>9</sub> H <sub>15</sub> O <sub>3</sub> <sup>-</sup>                                                |                    |                                                                                                                                                                                                                      |
| C  | 195.1033     | 195.1027             | C <sub>11</sub> H <sub>15</sub> O <sub>3</sub> <sup>-</sup>                                               |                    |                                                                                                                                                                                                                      |
| D  | 213.1138     | 213.1132             | C <sub>11</sub> H <sub>17</sub> O <sub>4</sub> <sup>-</sup>                                               |                    |                                                                                                                                                                                                                      |
| G  | 168.1035     | 168.103              | C <sub>9</sub> H <sub>14</sub> NO <sub>2</sub> <sup>-</sup>                                               |                    | <b>9-NO<sub>2</sub>-CLA</b><br>Exp Mass: 324.2180<br>Exact Mass: 324.2180                                                                                                                                            |
| H  | 210.1142     | 210.1136             | C <sub>11</sub> H <sub>16</sub> NO <sub>3</sub> <sup>-</sup>                                              |                    |                                                                                                                                                                                                                      |
| I  | 224.1298     | 224.1292             | C <sub>12</sub> H <sub>18</sub> NO <sub>3</sub> <sup>-</sup>                                              |                    |                                                                                                                                                                                                                      |
| a  | 159.0918     | 159.0913             | C <sub>8</sub> H <sub>13</sub> <sup>18</sup> O <sup>16</sup> O <sub>2</sub> <sup>-</sup>                  |                    | <b>12-<sup>15</sup>N<sup>18</sup>O<sup>16</sup>O-CLA</b><br>Exp Mass: 327.2193<br>Exact Mass: 327.2193<br>or<br><b>12-<sup>15</sup>N<sup>18</sup>O<sub>2</sub>-CLA</b><br>Exp Mass: 329.2234<br>Exact Mass: 329.2236 |
| b  | 173.1075     | 173.1069             | C <sub>9</sub> H <sub>15</sub> <sup>18</sup> O <sup>16</sup> O <sub>2</sub> <sup>-</sup>                  |                    |                                                                                                                                                                                                                      |
| c  | 197.1075     | 197.1069             | C <sub>11</sub> H <sub>15</sub> <sup>18</sup> O <sup>16</sup> O <sub>2</sub> <sup>-</sup>                 |                    |                                                                                                                                                                                                                      |
| d  | 215.1182     | 215.1175             | C <sub>11</sub> H <sub>17</sub> <sup>18</sup> O <sup>16</sup> O <sub>3</sub> <sup>-</sup>                 |                    |                                                                                                                                                                                                                      |
| d' | 217.1122     | 217.1217             | C <sub>11</sub> H <sub>17</sub> <sup>18</sup> O <sub>2</sub> <sup>16</sup> O <sub>2</sub> <sup>-</sup>    |                    |                                                                                                                                                                                                                      |
| g' | 169.1006     | 169.100              | C <sub>9</sub> H <sub>14</sub> <sup>15</sup> NO <sub>2</sub> <sup>-</sup>                                 |                    | <b>9-<sup>15</sup>N<sup>18</sup>O<sup>16</sup>O-CLA</b><br>Exp Mass: 327.2193<br>Exact Mass: 327.2193<br>or<br><b>9-<sup>15</sup>N<sup>18</sup>O<sub>2</sub>-CLA</b><br>Exp Mass: 329.2234<br>Exact Mass: 329.2236   |
| h  | 213.1138     | 213.1148             | C <sub>11</sub> H <sub>16</sub> <sup>15</sup> N <sup>18</sup> O <sup>16</sup> O <sub>2</sub> <sup>-</sup> |                    |                                                                                                                                                                                                                      |
| i' | 227.1312     | 227.1305             | C <sub>12</sub> H <sub>18</sub> <sup>15</sup> N <sup>18</sup> O <sup>16</sup> O <sub>2</sub> <sup>-</sup> |                    |                                                                                                                                                                                                                      |
